# Supplementary material for: Ni–Al/CoOx-catalyzed hydrodeoxygenation of 5-hydroxymethylfurfural into 2,5-dimethylfuran at low temperatures without external hydrogen
Source: Royal Society of Chemistry journal article supplement (doi:10.1039/d1gc02758a), 2021-01-01
Supplement: d1gc02758a1.pdf [file d1gc02758a1.pdf]

**Supporting Information**

**Ni-Al/CoO<sub>x</sub> catalyzing hydrodeoxygenation  
of 5-hydroxymethyl furfural into 2,5-  
dimethylfuran at low-temperature without  
external hydrogen**

Zhanghui Xia<sup>a</sup>, Libo Niu<sup>a\*</sup>, Yadan An<sup>a</sup>, Gang Bian<sup>a</sup>, Tianming Li<sup>a</sup>, Guoyi Bai<sup>a\*</sup>

<sup>a</sup> Key Laboratory of Chemical Biology of Hebei Province, College of Chemistry and Environmental Science, Hebei University, Baoding 071002, P.R. China.

\*Corresponding authors:

E-mail addresses: niulibohbu@hotmail.com; baiguoyi@hotmail.com

## Table of Contents

- 1. Fig. S1** XRD patterns of CoOx (a), Ni/CoOx (b), Al/CoOx (c) and Ni-Al/CoOx-1 (d) samples after calcination in the  $2\theta$  ranges of  $35\text{--}40^\circ$ , respectively.
- 2. Fig. S2** TEM images of the CoOx sample.
- 3. Fig. S3** TEM images of the Ni/CoOx sample.
- 4. Fig. S4** TEM images of the Al/CoOx sample.
- 5. Fig. S5** CO-DRIFTS spectra of Ni/CoOx, Ni-Al/CoOx-3, Ni-Al/CoOx-1 and Ni-Al/CoOx-0.5 samples at room temperature (a). EPR spectra of CoOx, Ni/CoOx and Ni-Al/CoOx-1 samples (b).
- 6. Fig. S6** Pyridine-FTIR spectra for CoOx, Ni/CoOx, Al/CoOx and Ni-Al/CoOx-1 catalysts, recorded at (a)  $200^\circ\text{C}$  and (b)  $350^\circ\text{C}$ .
- 7. Fig. S7** *In situ* DRIFT adsorption of furfural without catalysts.
- 8. Fig. S8** FT-IR spectra of the fresh and used Ni-Al/CoOx-1 catalyst in the wavenumber ranges of  $500\text{--}4000\text{cm}^{-1}$  (a) and  $1250\text{--}1800\text{cm}^{-1}$  (b) respectively.
- 9. Fig. S9** TG-MS of Ni-Al/CoOx-1 before and after 7 cycles of reaction.
- 10. Table S1** ICP-OES data of Ni/CoOx, Al/CoOx, Ni-Al/CoOx-0.5, Ni-Al/CoOx-1 and Ni-Al/CoOx-3 samples.
- 11. Table S2** Gaussian fitting analysis of  $\text{H}_2$ -TPR patterns of the calcined catalysts.
- 12. Table S3** Quantitative analysis of surface acid sites on different samples.
- 13. Table S4** Conversion and selectivity of liquid-phase HMF catalytic transfer hydrogenation on different samples.
- 14. Table S5** Comparison of the catalytic performance of Ni-Al/CoOx with other reported catalysts for the hydrogenation of HMF.

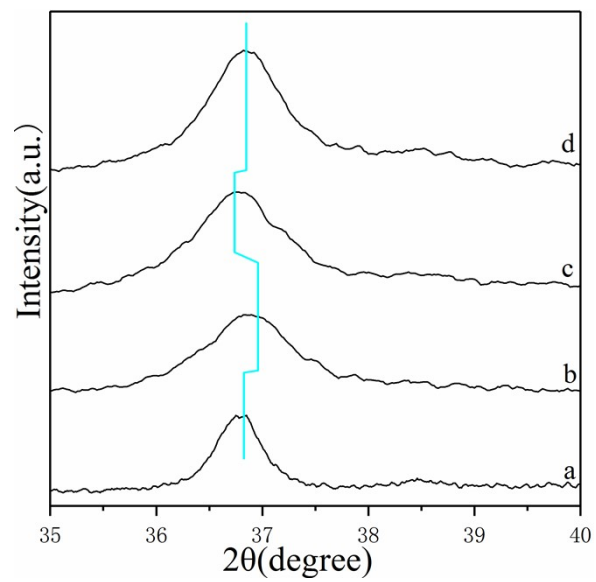

**Fig. S1** XRD patterns of CoOx (a), Ni/CoOx (b), Al/CoOx (c) and Ni-Al/CoOx-1 (d) samples after calcination in the  $2\theta$  ranges of 35-40°, respectively.

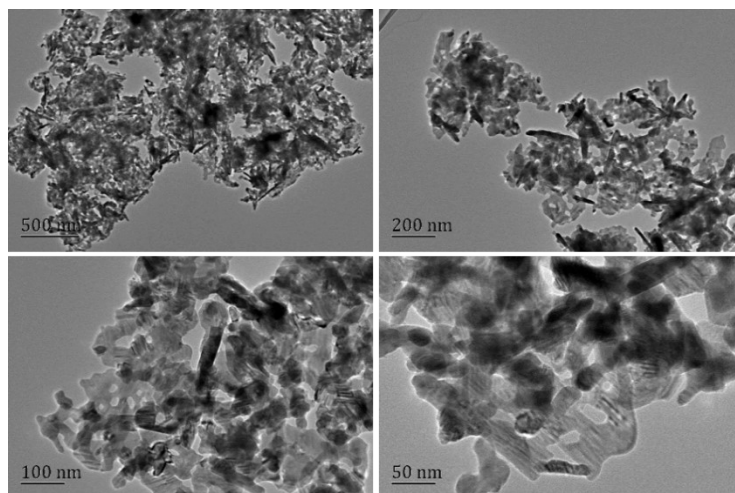

**Fig. S2** TEM images of the CoOx sample.

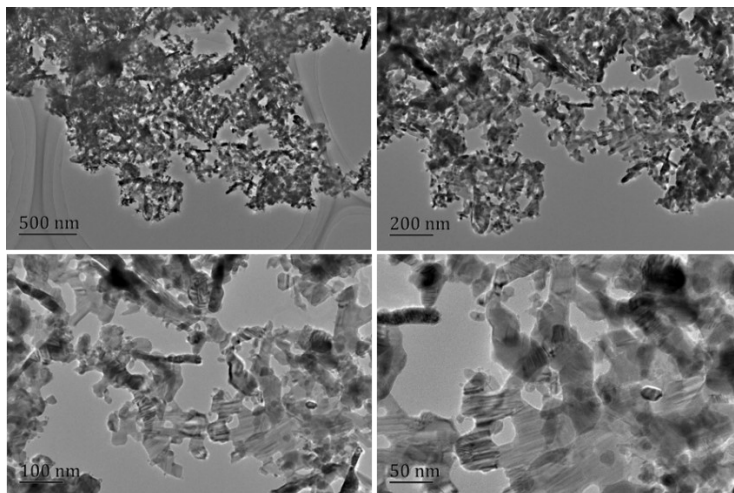

**Fig. S3** TEM images of the Ni/CoOx sample.

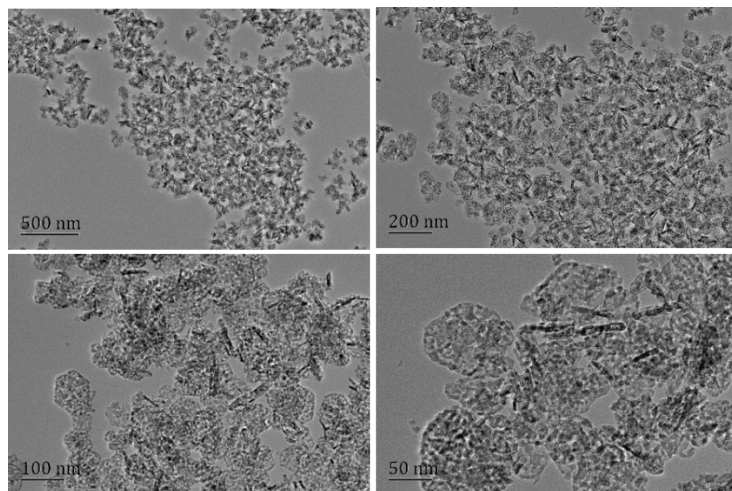

**Fig. S4** TEM images of the Al/CoOx sample.

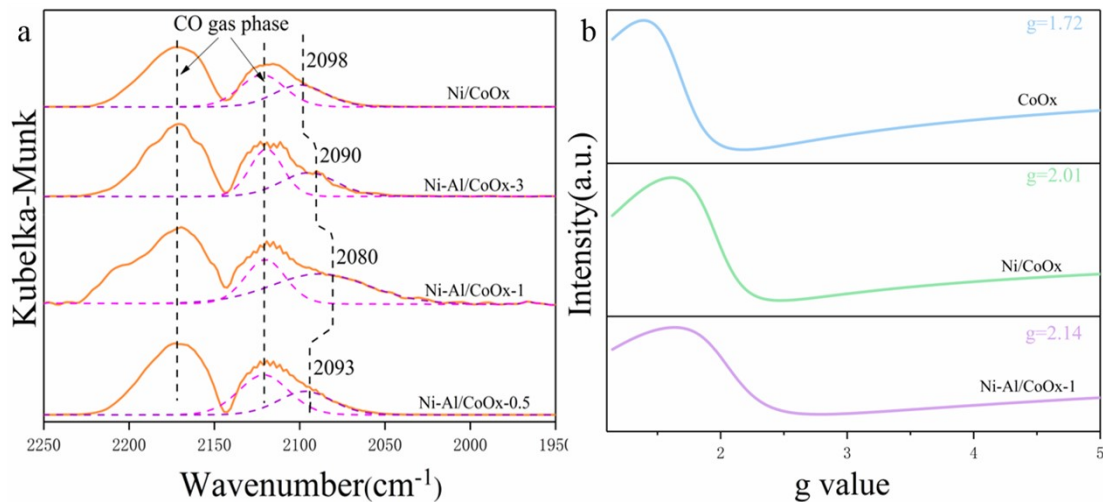

**Fig. S5** CO-DRIFTS spectra of Ni/CoOx, Ni-Al/CoOx-3, Ni-Al/CoOx-1 and Ni-Al/CoOx-0.5 samples at room temperature (a). EPR spectra of CoOx, Ni/CoOx and Ni-Al/CoOx-1 samples (b).

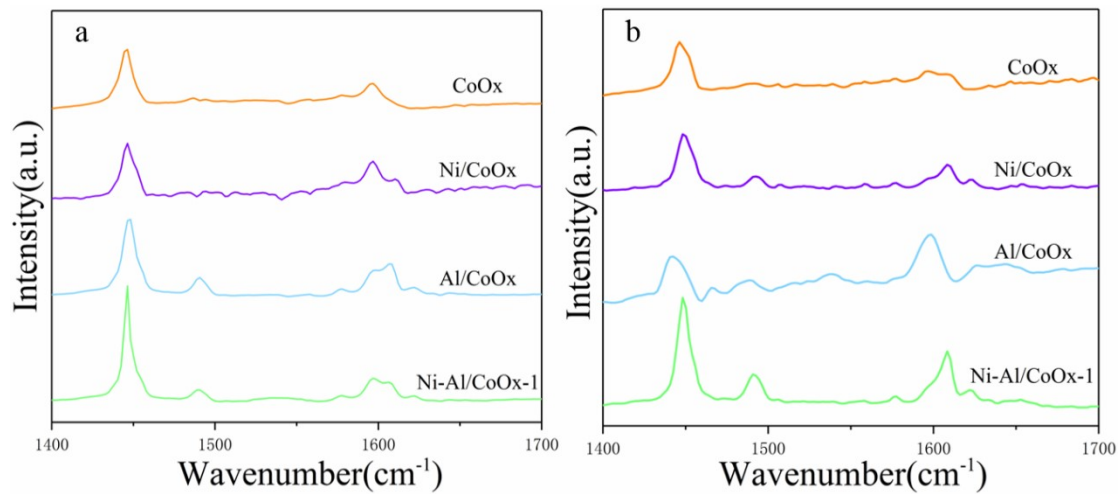

**Fig. S6** Pyridine-FTIR spectra for CoOx, Ni/CoOx, Al/CoOx and Ni-Al/CoOx-1 catalysts, recorded at (a) 200 °C and (b) 350 °C.



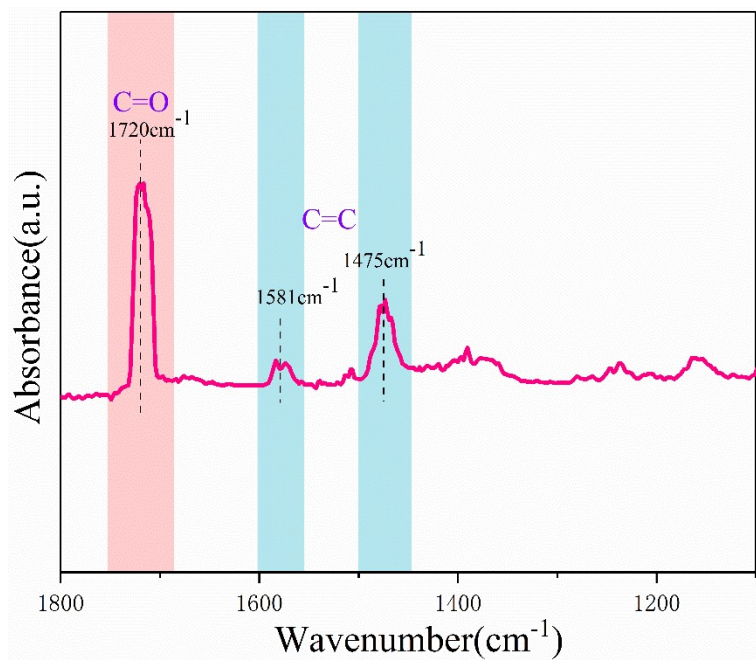

**Fig. S7** *In situ* DRIFT adsorption of furfural without catalysts.

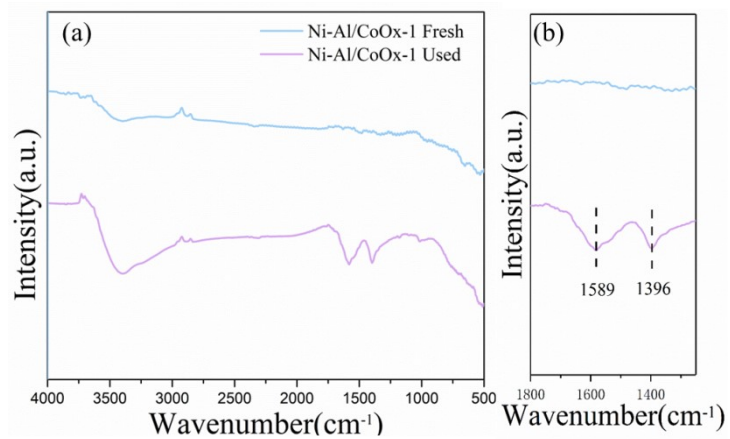

**Fig. S8** FT-IR spectra of the fresh and used Ni-Al/CoOx-1 catalyst in the wavenumber ranges of 500-4000cm<sup>-1</sup> (a) and 1250-1800cm<sup>-1</sup> (b) respectively.

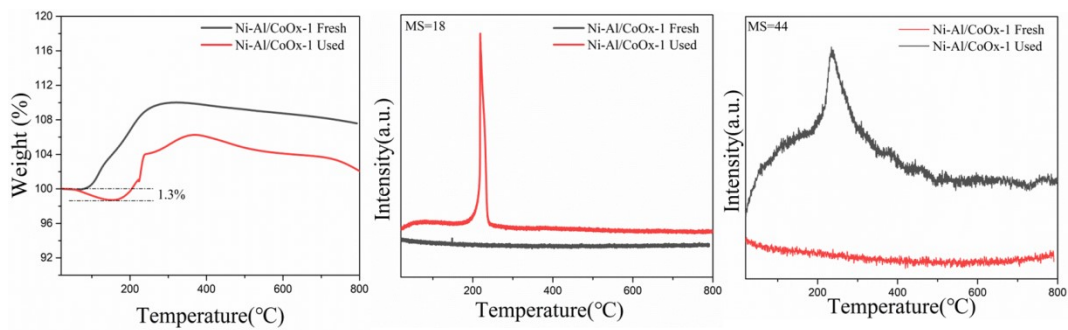

**Fig. S9** TG-MS of Ni-Al/CoOx-1 before and after 7 cycles of reaction.

**Table S1** ICP-OES data of Ni/CoOx, Al/CoOx, Ni-Al/CoOx-0.5, Ni-Al/CoOx-1 and Ni-Al/CoOx-3 samples.

| Catalysts      | Theoretical |          |          |                    | Actual   |          |          |                    |
|----------------|-------------|----------|----------|--------------------|----------|----------|----------|--------------------|
|                | Ni (wt%)    | Al (wt%) | Co (wt%) | Ni/Al <sup>a</sup> | Ni (wt%) | Al (wt%) | Co (wt%) | Ni/Al <sup>a</sup> |
| Ni/CoOx        | 20.0        | -        | 80.0     | -                  | 24.9     | -        | 75.1     | -                  |
| Al/CoOx        | -           | 10.5     | 89.5     | -                  | -        | 6.9      | 93.1     | -                  |
| Ni-Al/CoOx-0.5 | 7.3         | 6.7      | 86.0     | 0.5                | 7.4      | 5.7      | 86.9     | 0.5                |
| Ni-Al/CoOx-1   | 10.7        | 4.9      | 84.4     | 1.0                | 11.1     | 4.4      | 84.5     | 1.1                |
| Ni-Al/CoOx-3   | 15.5        | 2.3      | 82.2     | 3.0                | 16.2     | 2.1      | 81.7     | 3.5                |

<sup>a</sup> The molar ratio of Ni/Al.

**Table S2** Gaussian fitting analysis of H<sub>2</sub>-TPR patterns of the calcined catalysts.

| Samples      | Total H <sub>2</sub><br>Consumption( $\mu$ mmol/g) | Reduction temperature( $^{\circ}$ C)/Relative content(%) |               |               |               |               |
|--------------|----------------------------------------------------|----------------------------------------------------------|---------------|---------------|---------------|---------------|
|              |                                                    | Co <sub>3</sub> O <sub>4</sub>                           | $\alpha$ -CoO | $\gamma$ -CoO | $\alpha$ -NiO | $\gamma$ -NiO |
| CoOx         | 1.859 $\times$ 10 <sup>4</sup>                     | 272/23.3                                                 | 347/76.7      | -             | -             | -             |
| Ni/CoOx      | 1.833 $\times$ 10 <sup>4</sup>                     | 205/20.0                                                 | 314/56.1      | -             | 381/23.9      | -             |
| Al/CoOx      | 1.368 $\times$ 10 <sup>4</sup>                     | 290/22.7                                                 | -             | 677/77.3      | -             | -             |
| Ni-Al/CoOx-1 | 1.559 $\times$ 10 <sup>4</sup>                     | 245/20.9                                                 | -             | 580/60.0      | 325/2.1       | 734/17.0      |

**Table S3** Quantitative analysis of surface acid sites on different samples.

| Catalyst     | Temperature(°C) |     |     | Contents of acid sites ( $\mu\text{mol NH}_3/\text{g}_{\text{catalyst}}$ ) <sup>a</sup> |      |      | Total contents of acid sites ( $\mu\text{mol NH}_3/\text{g}_{\text{catalyst}}$ ) |
|--------------|-----------------|-----|-----|-----------------------------------------------------------------------------------------|------|------|----------------------------------------------------------------------------------|
|              | T1              | T2  | T3  | T1                                                                                      | T2   | T3   |                                                                                  |
| CoOx         | 66              | 335 | -   | 32.2                                                                                    | 7.1  | -    | 39.3                                                                             |
| Ni/CoOx      | 66              | 338 | 555 | 38.5                                                                                    | 24.8 | 61.1 | 124.4                                                                            |
| Ni-Al/CoOx-1 | 80              | 270 | 513 | 330.2                                                                                   | 80.8 | 26.5 | 437.5                                                                            |
| Al/CoOx      | 80              | 263 | -   | 493.8                                                                                   | 7.6  | -    | 501.4                                                                            |

<sup>a</sup> Calculated from the Percentage of peak area.

**Table S4** Conversion and selectivity of liquid-phase HMF catalytic transfer hydrogenation on different samples.

| Catalyst       | Conv.<br>(%) | Sel.(%)                                                                           |                                                                                   |                                                                                   |                                                                                    |                                                                                     |                                                                                     |
|----------------|--------------|-----------------------------------------------------------------------------------|-----------------------------------------------------------------------------------|-----------------------------------------------------------------------------------|------------------------------------------------------------------------------------|-------------------------------------------------------------------------------------|-------------------------------------------------------------------------------------|
|                |              |  |  |  |  |  |  |
| CoOx           | 21.8         | 0                                                                                 | 4.6                                                                               | 18.3                                                                              | 77.1                                                                               | -                                                                                   | -                                                                                   |
| Al/CoOx        | 69.3         | 0                                                                                 | 1.6                                                                               | 7.5                                                                               | 90.9                                                                               | -                                                                                   | -                                                                                   |
| Ni/CoOx        | 32.3         | 2.5                                                                               | 8.7                                                                               | 13.9                                                                              | 62.5                                                                               | 4.2                                                                                 | 8.2                                                                                 |
| Ni-Al/CoOx-0.5 | 95.6         | 47.2                                                                              | 31.4                                                                              | 2.4                                                                               | 13.3                                                                               | 2.3                                                                                 | 3.4                                                                                 |
| Ni-Al/CoOx-1   | 99.9         | 97.2                                                                              | 0                                                                                 | 0                                                                                 | 0                                                                                  | 0.5                                                                                 | 2.3                                                                                 |
| Ni-Al/CoOx-2   | 99.9         | 74.5                                                                              | 0                                                                                 | 0                                                                                 | 3.5                                                                                | 10.1                                                                                | 11.9                                                                                |
| Ni-Al/CoOx-3   | 93.1         | 7.0                                                                               | 36.4                                                                              | 7.2                                                                               | 27.7                                                                               | 9.5                                                                                 | 12.2                                                                                |

Reaction conditions: 210°C, 1 h, 0.21 g HMF, 0.1 g catalyst, 40 mL 2-propanol, 0.5 MPa N<sub>2</sub>, 400 r/min.

**Table S5** Comparison of the catalytic performance of Ni-Al/CoOx with other reported catalysts for the hydrogenation of HMF.

| Entry     | Catalyst                          | T(°C)      | Time(h)   | Hydrogen source   | Conv.(%)    | Yield (%)   | DMF productivity<br>(mol <sub>DMF</sub> /g <sub>catalyst</sub> *h <sup>-1</sup> ) | Reference        |
|-----------|-----------------------------------|------------|-----------|-------------------|-------------|-------------|-----------------------------------------------------------------------------------|------------------|
| 1         | CuZnCoOx                          | 210        | 5         | ethanol           | 100         | 99.0        | 0.00516                                                                           | [2]              |
| 2         | NC-Cu/MgAlO                       | 220        | 0.5       | cyclohexanol      | 100         | 96.1        | 0.076                                                                             | [3]              |
| 3         | Ru/C                              | 190        | 6         | 2-propanol        | 100         | 81.0        | -                                                                                 | [4]              |
| 4         | RuO <sub>2</sub> -Ru/C            | 190        | 6         | 2-propanol        | 100         | 72.0        | -                                                                                 | [5]              |
| 5         | Cu-Pd@RGO                         | 200        | -         | 2-propanol        | 96          | 95          | 0.0388                                                                            | [6]              |
| 6         | Pd/Fe <sub>2</sub> O <sub>3</sub> | 180        | -         | 2-propanol        | 100         | 72.0        | -                                                                                 | [7]              |
| 7         | Cu-PMO                            | 300        | 0.75      | methanol          | 100         | 34.0        | 0.00359                                                                           | [8]              |
| 8         | Cu/Al                             | 240        | 6         | methanol          | 100         | 75.0        | -                                                                                 | [9]              |
| 9         | Co-Ni/C                           | 210        | 24        | Formic acid       | 99          | 90          | 0.00037                                                                           | [10]             |
| 12        | Co@NGs                            | 200        | 6         | H <sub>2</sub>    | 100         | 94.7        | 0.00394                                                                           | [11]             |
| 13        | Co-Cu/C                           | 180        | 8         | H <sub>2</sub>    | 100         | 99.4        | 0.12276                                                                           | [12]             |
| 14        | NiZnAl                            | 180        | 15        | H <sub>2</sub>    | 100         | 93.6        | 0.00492                                                                           | [13]             |
| 15        | Fe-Co-Ni/h-BN                     | 180        | 4.5       | H <sub>2</sub>    | 100         | 94          | 0.00208                                                                           | [14]             |
| 16        | Ni/LaFeO <sub>3</sub>             | 230        | 6         | H <sub>2</sub>    | >99         | 98.3        | 0.00163                                                                           | [15]             |
| 17        | NiFe/CNTs                         | 200        | 3         | H <sub>2</sub>    | 100         | 91.3        | 0.02426                                                                           | [16]             |
| 18        | Fe-L1/C                           | 240        | 5         | H <sub>2</sub>    | 100         | 86          | 0.00086                                                                           | [17]             |
| 19        | NiSi-PS                           | 150        | 3         | H <sub>2</sub>    | 100         | 90.2        | 0.04464                                                                           | [18]             |
| 20        | Cu-Ni/TiO <sub>2</sub>            | 200        | 8         | H <sub>2</sub>    | 100         | 84.3        | 0.00138                                                                           | [19]             |
| <b>10</b> | <b>Ni-Al/CoOx</b>                 | <b>170</b> | <b>4</b>  | <b>2-propanol</b> | <b>99.9</b> | <b>96.8</b> | <b>0.00416</b>                                                                    | <b>This work</b> |
| <b>11</b> | <b>Ni-Al/CoOx</b>                 | <b>130</b> | <b>36</b> | <b>2-propanol</b> | <b>98.7</b> | <b>87.2</b> | <b>0.00040</b>                                                                    | <b>This work</b> |



## REFERENCES

- [1] Y. Lu, D. Guo, Y. Zhao, P. S. Moyo, Y. Zhao, S. Wang, Xinbin Ma, *J. Catal.*, 2021, **396**, 65-80.
- [2] Z. Zhang, S. Yao, C. Wang, M. Liu, F. Zhang, X. Hu, H. Chen, X. Gou, K. Chen, Y. Zhu, X. Lu, P. Ouyang and J. Fu, *J. Catal.*, 2019, **373**, 314-321.
- [3] Z. Gao, C. Li, G. Fan, L. Yang and F. Li, *Appl. Catal. B*, 2018, **226**, 523-533.
- [4] J. Jae, W. Zheng, R. F. Lobo and D. G. Vlachos, *ChemSusChem*, 2013, **6**, 1158-1162.
- [5] J. Jae, W. Zheng, A. M. Karim, W. Guo, R. F. Lobo and D. G. Vlachos, *ChemCatChem*, 2014, **6**, 848-856.
- [6] S. Mhadmhan, A. Franco, A. Pineda, P. Reubroycharoen and R. Luque, *ACS Sustain. Chem. Eng.*, 2019, **7**, 14210-14216.
- [7] D. Scholz, C. Aellig and I. Hermans, *ChemSusChem*, 2014, **7**, 268-275.
- [8] T. S. Hansen, K. Barta, P. T. Anastas, P. C. Ford and A. Riisager, *Green Chem.*, 2012, **14**, 2457.
- [9] Z. Zhang, C. Wang, X. Gou, H. Chen, K. Chen, X. Lu, P. Ouyang and J. Fu, *Appl. Catal. A*, 2019, **570**, 245-250.
- [10] P. Yang, Q. Xia, X. Liu and Y. Wang, *Fuel*, 2017, **187**, 159-166.
- [11] J. Wang, Q. Wei, Q. Ma, Z. Guo, F. Qin, Z. R. Ismagilov and W. Shen, *Appl. Catal. B*, 2020, **263**, 118339.
- [12] B. Chen, F. Li, Z. Huang and G. Yuan, *Appl. Catal. B*, 2017, **200**, 192-199.
- [13] X. Kong, Y. Zhu, H. Zheng, Y. Zhu and Z. Fang, *ACS Sustain. Chem. Eng.*, 2017, **5**, 11280-11289.
- [14] N. Chen, Z. Zhu, T. Su, W. Liao, C. Deng, W. Ren, Y. Zhao and H. Lü, *Chem. Eng. J.*, 2020, **381**, 122755.
- [15] M.-Y. Chen, C.-B. Chen, B. Zada and Y. Fu, *Green Chem.*, 2016, **18**, 3858-3866.
- [16] L. Yu, L. He, J. Chen, J. Zheng, L. Ye, H. Lin and Y. Yuan, *ChemCatChem*, 2015, **7**, 1701-1707.
- [17] L. Jiang, L. Junling, L. Heyang and X. Guangyue, *ChemSusChem*, 2017, **10**, 1436-1447.
- [18] X. Kong, Y. Zhu, H. Zheng, X. Li, Y. Zhu and Y.-W. Li, *ACS Catal.*, 2015, **5**, 5914-5920.
- [19] B. Seemala, C. M. Cai, C. E. Wyman and P. Christopher, *ACS Catal.*, 2017, **7**, 4070-4082.
